# Supplementary material for: How populations differentiate despite gene flow: sexual and natural selection drive phenotypic divergence within a land fish, the Pacific leaping blenny
Source: PubMed Central journal article supplement (PMC4055934; doi:10.1186/1471-2148-14-97), 2014-05-06

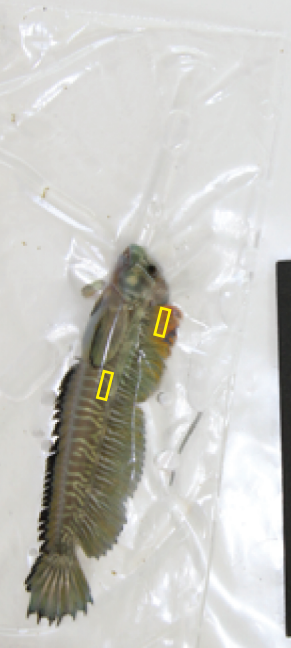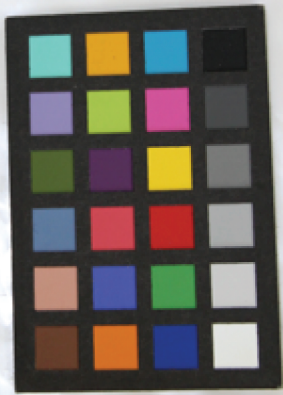

TC13

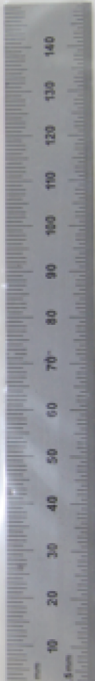

Supplement: 1471-2148-14-97-S4.pdf [file 1471-2148-14-97-S4.pdf]
